# Supplementary material for: PVP-Assisted Shellac Nanofiber Membrane as Highly Efficient, Eco-Friendly, Translucent Air Filter
Source: MDPI journal article supplement (doi:10.3390/app112311094), 2021-11-23
Supplement: s1 [file s1]

## Article

# PVP-Assisted Shellac Nanofiber Membrane as Highly Efficient, Eco-Friendly, Translucent Air Filter

Shanshuai Lu <sup>1,\*</sup>, Congling Li <sup>1,\*</sup>, Rui Liu <sup>2</sup> and Aifeng Lv <sup>1,\*</sup>
<sup>1</sup> College of Chemistry and Chemical Engineering, Shanghai University of Engineering Science, Shanghai 201620, China; shanshuailu@sues.edu.cn

<sup>2</sup> Shanghai Key Lab of D&A for Metal-Functional Materials, School of Materials Science and Engineering, Tongji University, Shanghai 201804, China; ruiliu@tongji.edu.cn

\* Correspondence: conglings@sues.edu.cn (C.L.); lvafeng@sues.edu.cn (A.L.)

**Citation:** Lu, S.; Li, C.; Liu, R.; Lv, A. PVP-Assisted Shellac Nanofiber Membrane as Highly Efficient, Eco-Friendly, Translucent Air Filter. *Appl. Sci.* **2021**, *11*, 11094. <https://doi.org/10.3390/app112311094>

Academic Editor: Filippo Giannazzo

Received: 14 October 2021

Accepted: 20 November 2021

Published: 22 November 2021

**Publisher's Note:** MDPI stays neutral with regard to jurisdictional claims in published maps and institutional affiliations.

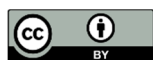

**Copyright:** © 2021 by the authors. Submitted for possible open access publication under the terms and conditions of the Creative Commons Attribution (CC BY) license (<https://creativecommons.org/licenses/by/4.0/>).

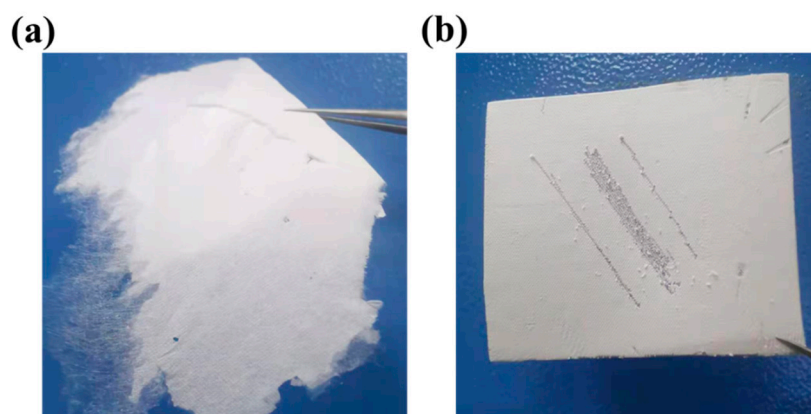

**Figure S1.** Optical images of P-shellac FME (a) and shellac fiber membrane (b) scratched by a tweezer.

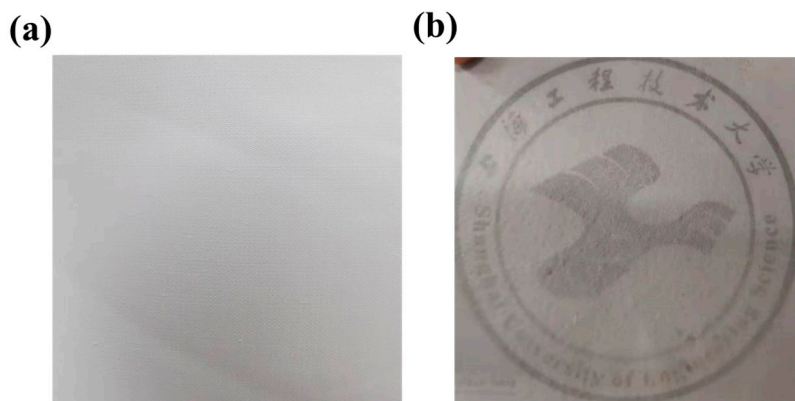

**Figure S2.** Optical images of pure shellac nanofiber membrane (a) and translucent P-Shellac FME (b).

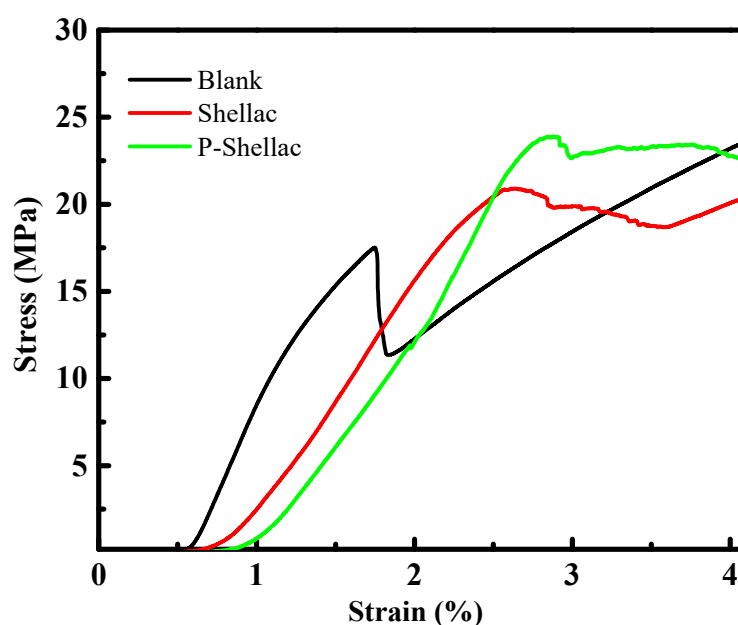

**Figure S3.** The tensile stress–strain curves of the blank (aluminum foil fixed on an elastic polyimide film), shellac and p-Shellac nanofiber films (deposited on aluminum foils which were then fixed on an elastic polyimide film). As the three nanofiber films are hard to peel off from the stainless-steel mesh, we directly deposited the electrospun nanofibers on the aluminum foil. The deposited three nanofiber films are too thin to get the stress-strain curves. Hence, we fixed the aluminum foil on a thick elastic polyimide film before stress-strain measurement.

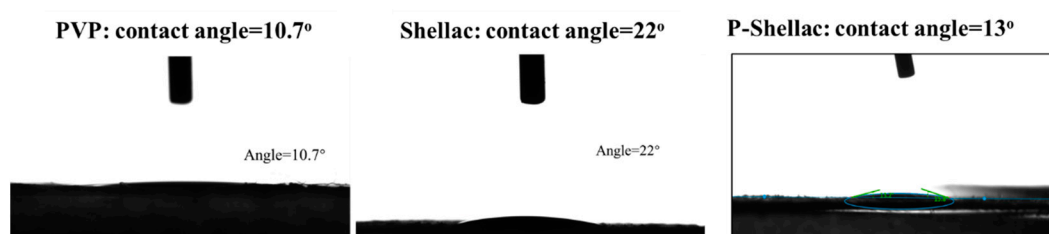

**Figure S4.** Contact angles of FME PVP, shellac FME, and P-Shellac FME.

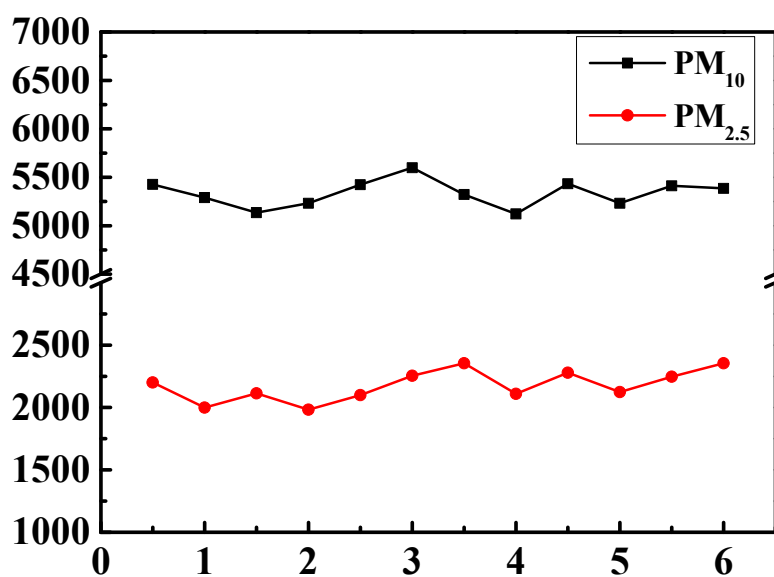

Figure S5. The concentrations of PM<sub>10</sub> and PM<sub>2.5</sub> in CBi'.

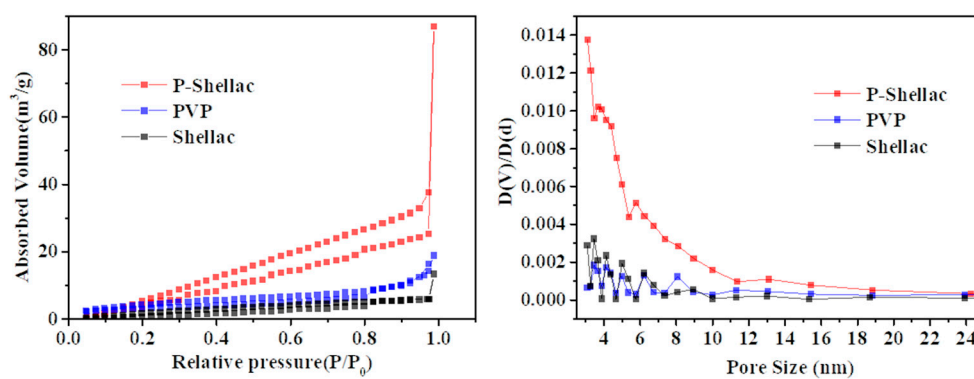

Figure S6. The N<sub>2</sub> adsorption–desorption isotherms (left) and pore size distributions (right) of nanofiber films of P-Shellac, PVP and shellac.

Table S1. Surface area and pore size distribution summary.

| Samples   | Surface Area (m <sup>2</sup> /g) | Pore size distribution (nm) |
|-----------|----------------------------------|-----------------------------|
| P-Shellac | 67.9                             | 3.9, 5.9, 13                |
| PVP       | 10.7                             | 3.6, 4.2, 5.1, 8.2, 11.4    |
| Shellac   | 1.9                              | 3.5, 4.3, 5.1, 6.2, 9.0     |

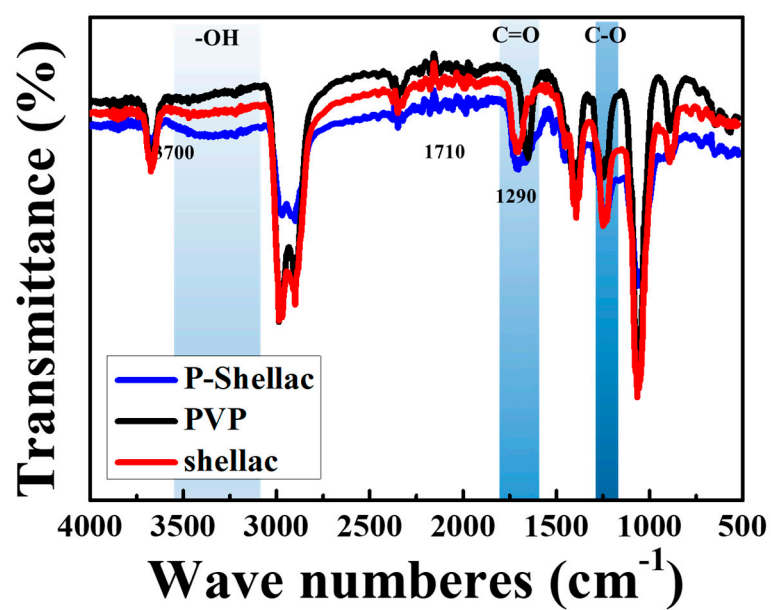

Figure S7. FTIR of three kinds of nanofibers films after air filtration for three hours.
